# Supplementary material for: Tissue-specific transposon-associated small RNAs in the gymnosperm tree, Norway spruce
Source: PubMed Central journal article supplement (PMC6923980; doi:10.1186/s12864-019-6385-7), 2019-12-19
Supplement: 12864_2019_6385_MOESM1_ESM.pdf [file 12864_2019_6385_MOESM1_ESM.pdf]

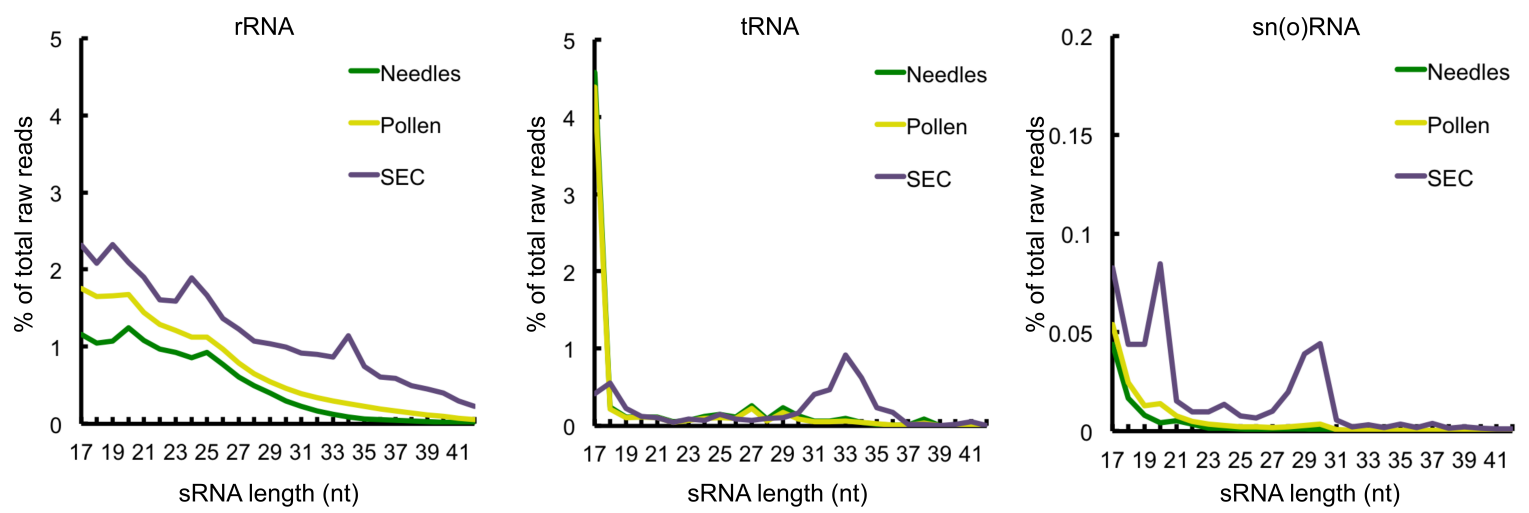

**Figure S1. Size distributions of sRNA derived from ribosomal/tranfer/small nuclear (nucleolar) RNA size distributions**

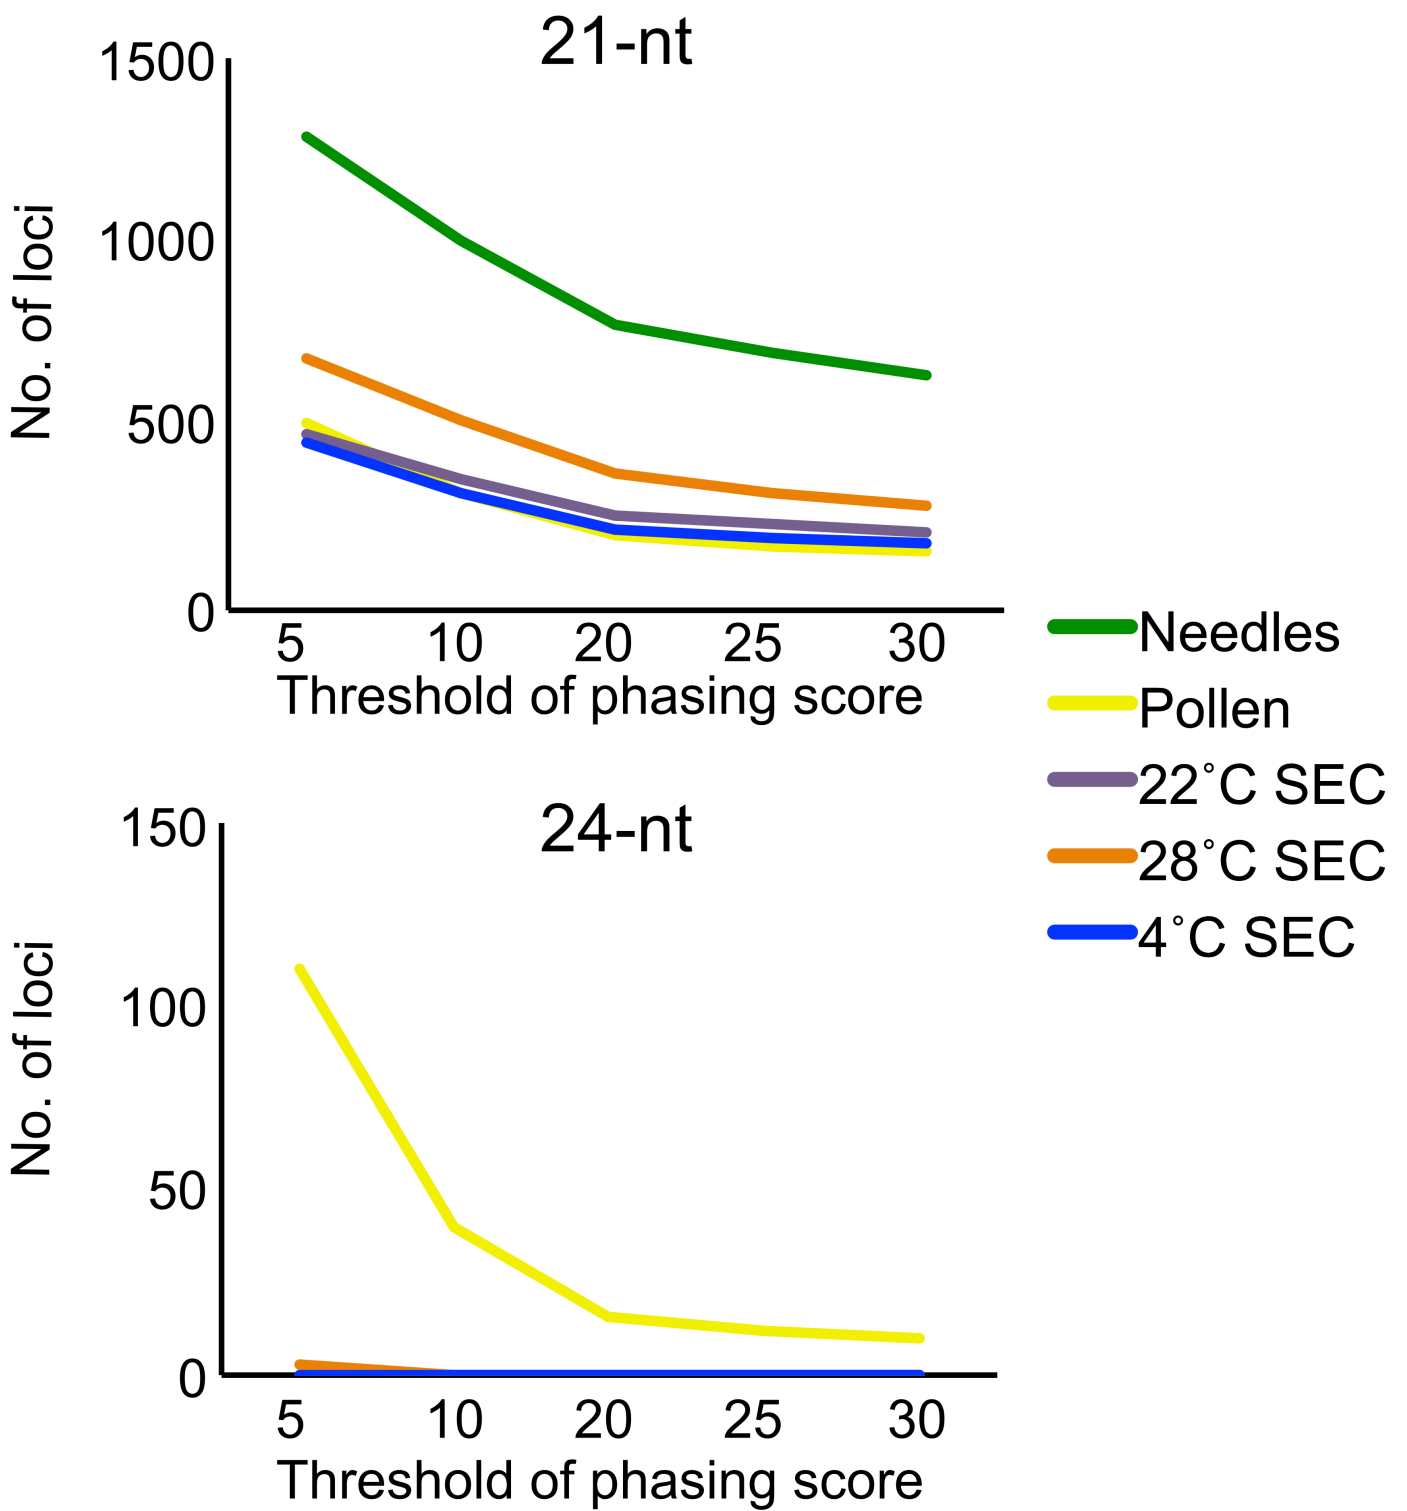

Figure S2 The number of sRNA cluster loci with certain phasing score

### Pa\_AGO

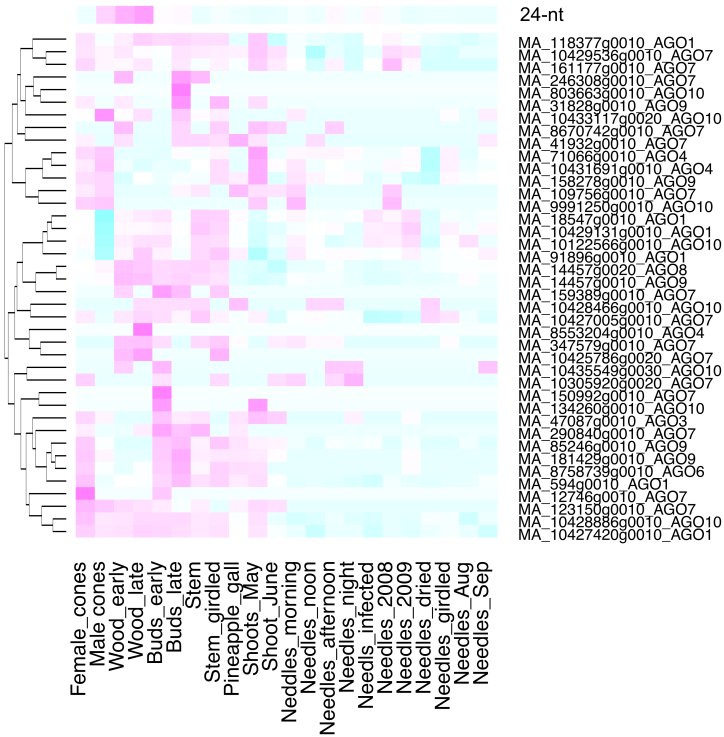

### Pa\_DCL

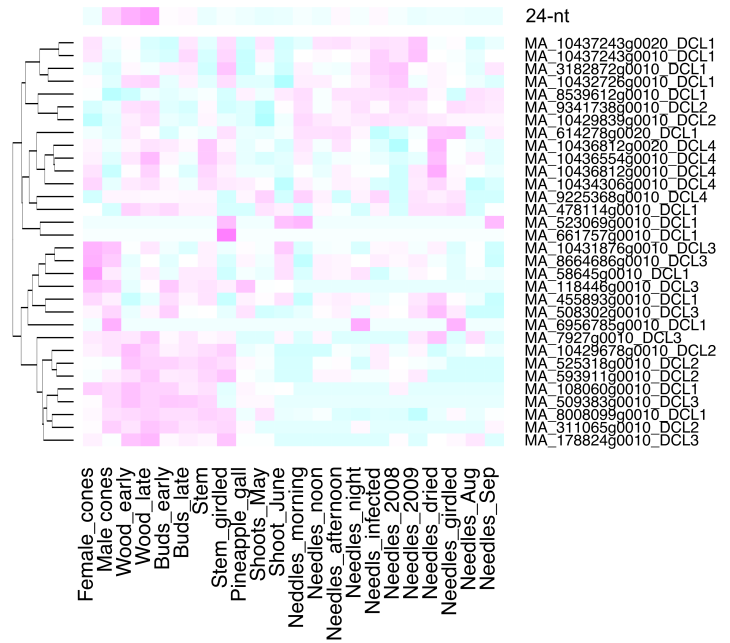

### Pa\_POLIV\_and\_V

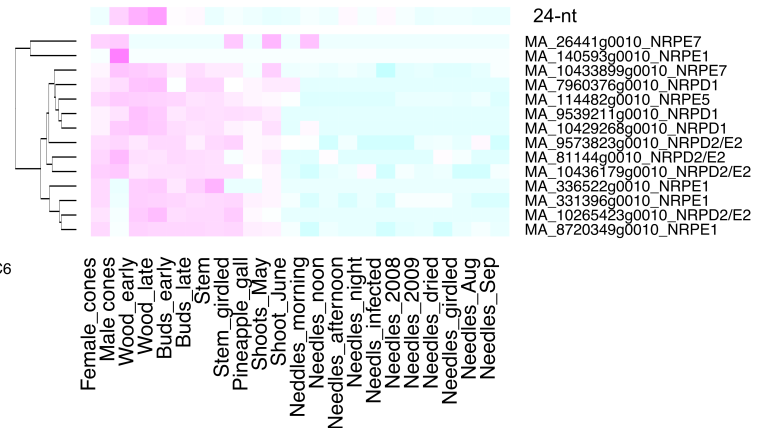

### Pa\_others

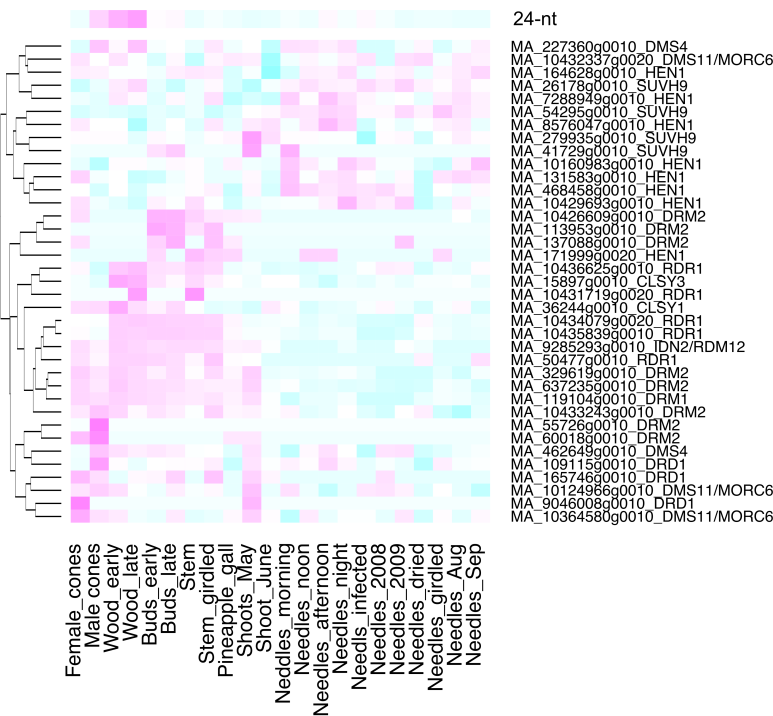

### Pa\_RDR

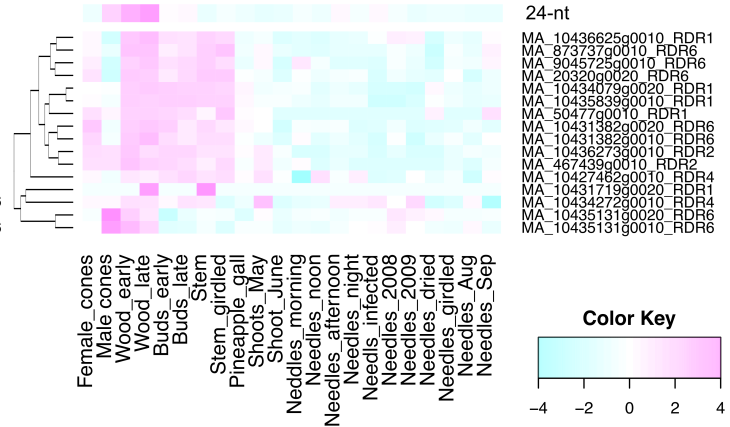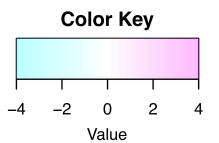

**Figure S3. Expression pattern of RdDM and sRNA related pathway component homologs**

The data of 24-nt sRNA amount was obtained from the dataset of the Norway spruce genome project (EPR002476) and normalized by total sRNA amount. All expression data were shown as Z-scores across samples. The names of the Arabidopsis homologs that were the best hit to each gene were attached to each gene identifier.

**Table S1. sRNA sequencing and mapping data**

| <b>Sample</b>         | <b>Reads in raw data</b> | <b>Read after filter out r/t/sn(o)RNA</b> | <b>Reads in 17-28nt size</b> | <b>Mapped reads</b> | <b>Non-redundant reads</b> |
|-----------------------|--------------------------|-------------------------------------------|------------------------------|---------------------|----------------------------|
| Needle_replication1   | 62246888                 | 21969723                                  | 20386327                     | 19529621            | 2797243                    |
| Needle_replication2   | 67037772                 | 23668772                                  | 22408892                     | 21386848            | 3485978                    |
| Pollen_replication1   | 44600069                 | 8132729                                   | 5399615                      | 5175633             | 1864591                    |
| Pollen_replication2   | 60627177                 | 16790315                                  | 9924427                      | 9417346             | 3372457                    |
| SEC_22°C_replication1 | 62698997                 | 11756275                                  | 5942660                      | 5520337             | 2094370                    |
| SEC_22°C_replication2 | 34028411                 | 9879186                                   | 5377901                      | 5126296             | 1769800                    |
| SEC_4°C_replication1  | 99579012                 | 20423807                                  | 9393006                      | 8838873             | 3056407                    |
| SEC_4°C_replication2  | 50391063                 | 16543628                                  | 7176959                      | 6629619             | 3206747                    |
| SEC_28°C_replication1 | 63131864                 | 14462530                                  | 8273195                      | 7777823             | 3270732                    |
| SEC_28°C_replication2 | 43640610                 | 12272653                                  | 7450165                      | 7116868             | 2432184                    |

**Abbreviations**

r/t/sn(o)RNA: ribosomal RNA, transfer RNA, and small nuclear (nucleolar) RNA-derived sequences

SEC: somatic-embryonic callus



**Table S2 24-nt sRNA clusters with phasing scores with above threshold**

| ID | Contig      | Start in genome coordinate | Length | Major sRNA size | Total number of sRNA in locus |
|----|-------------|----------------------------|--------|-----------------|-------------------------------|
| 1  | MA_10386971 | 2872                       | 931    | 24              | 1431                          |
| 2  | MA_10436928 | 10798                      | 713    | 24              | 1200                          |
| 3  | MA_12616    | 23428                      | 150    | 24              | 423                           |
| 4  | MA_183485   | 7926                       | 3238   | 24              | 6254                          |
| 5  | MA_18379    | 42634                      | 111    | 24              | 909                           |
| 6  | MA_20338    | 25504                      | 166    | 24              | 420                           |
| 7  | MA_230105   | 1711                       | 1166   | 24              | 1807                          |
| 8  | MA_3067     | 17637                      | 1197   | 24              | 1294                          |
| 9  | MA_3206     | 33382                      | 717    | 24              | 1927                          |
| 10 | MA_8253     | 6477                       | 4351   | 24              | 5167                          |
